# Supplementary material for: TopologyNet: Topology based deep convolutional and multi-task neural networks for biomolecular property predictions
Source: PubMed Central journal article supplement (PMC5549771; doi:10.1371/journal.pcbi.1005690), 2017-07-27
Supplement: pcbi.1005690.s002.pdf [file pcbi.1005690.s002.pdf]

### Architecture of TNet-BP

**Optimizer:** Adam, learning rate=0.0001. **Mini-batch size:** 16. **Epoch number:** 2000. **Weight initialize:** glorot\_uniform. **Notations:** Conv1D(filter number, filter size, activation, weight initialization), Dense(neuron number, activation, weight initialization), Dropout(dropout rate), Pooling(pooling size). The input is generated following the source code in S1 Code.

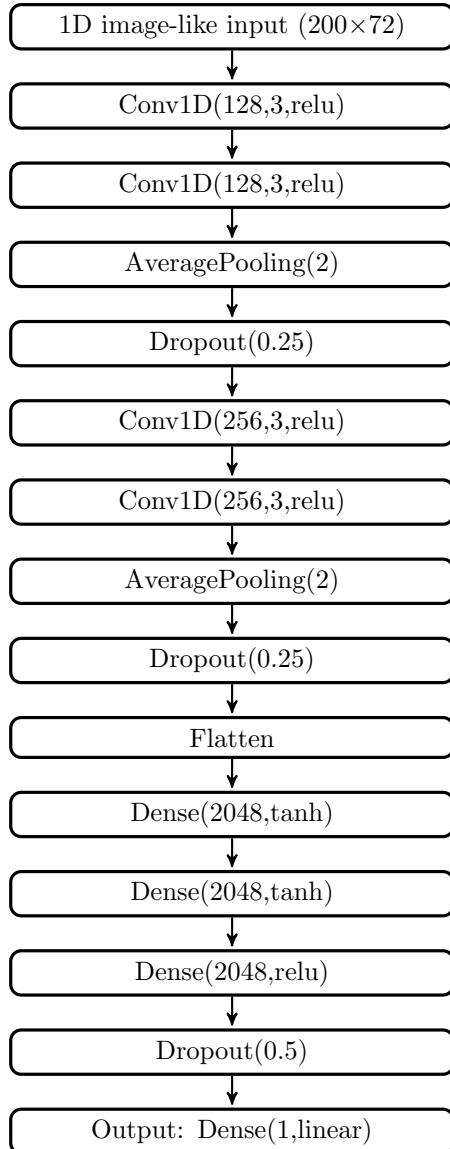

**Architectures of TNet-MP-1 (only topological input without the dashed part) and TNet-MP-2 (topological input and auxiliary features with the dashed part)**

**Optimizer:** Adam, learning rate=0.0001. **Mini-batch size:** 16. **Epoch number:** 500. **Notations:** Conv1D(filter number, filter size, activation, weight initialization), Dense(neuron number, activation, weight initialization), Dropout(dropout rate), Pooling(pooling size). The 1D image-like input is generated following the source code in S2 Code and the handcrafted feature input is generated according to the description and pseudocode in S1 Text.

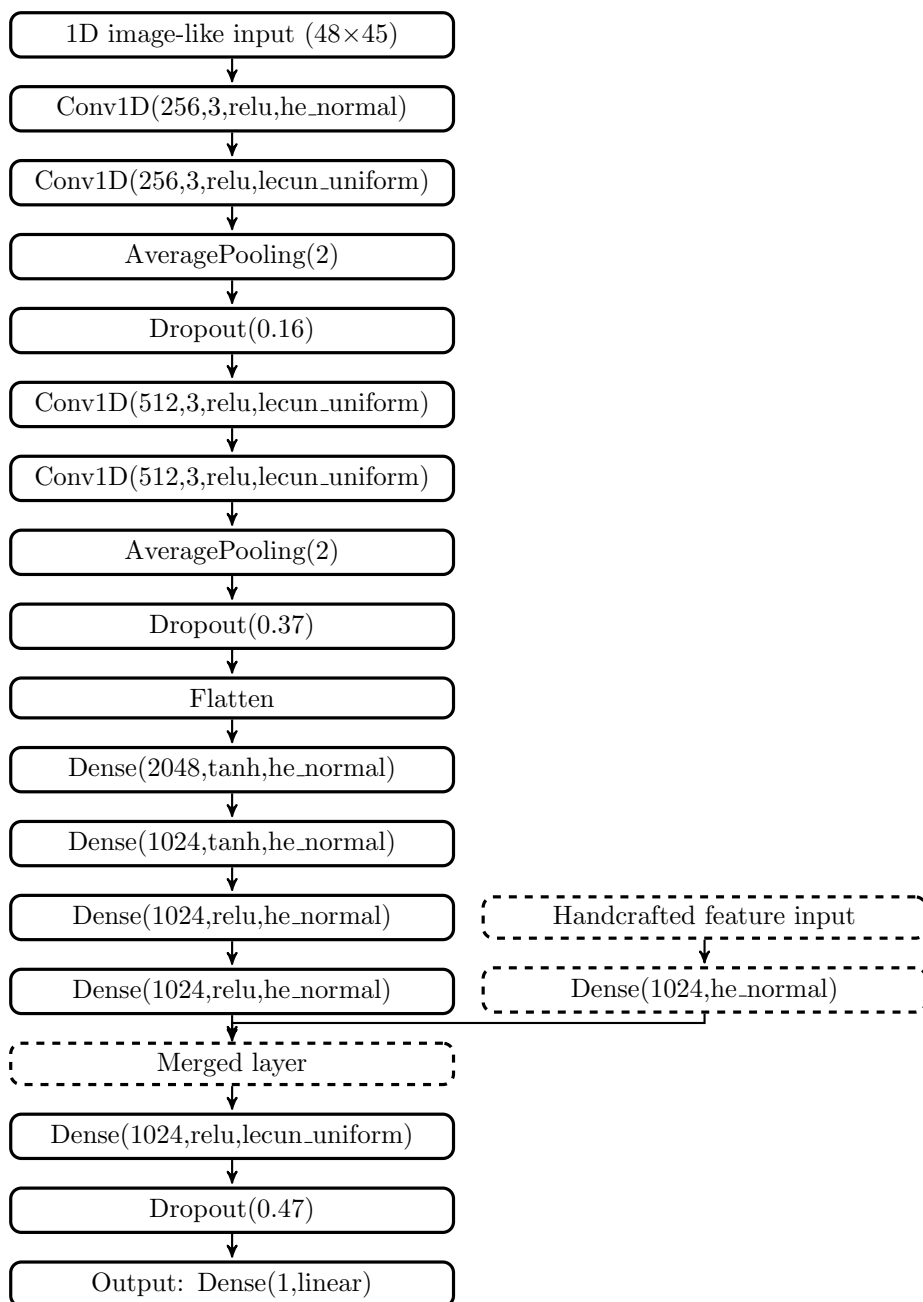

**Architectures of TNet-MMP-1 (single-task without the dashed part) and TNet-MMP-2 (multitask with the dashed part)**

**Optimizer:** Adam, learning rate=0.0001. **Mini-batch size:** 16. **Training:** 500 epoch (TNet-MMP-1); 800 epoch on globular branch followed by 100 epoch on membrane branch (TNet-MMP-2). **Notations:** Conv1D(filter number, filter size, activation, weight initialization), Dense(neuron number, activation, weight initialization), Dropout(dropout rate), Pooling(pooling size). The input is generated following the source code in S2 Code.

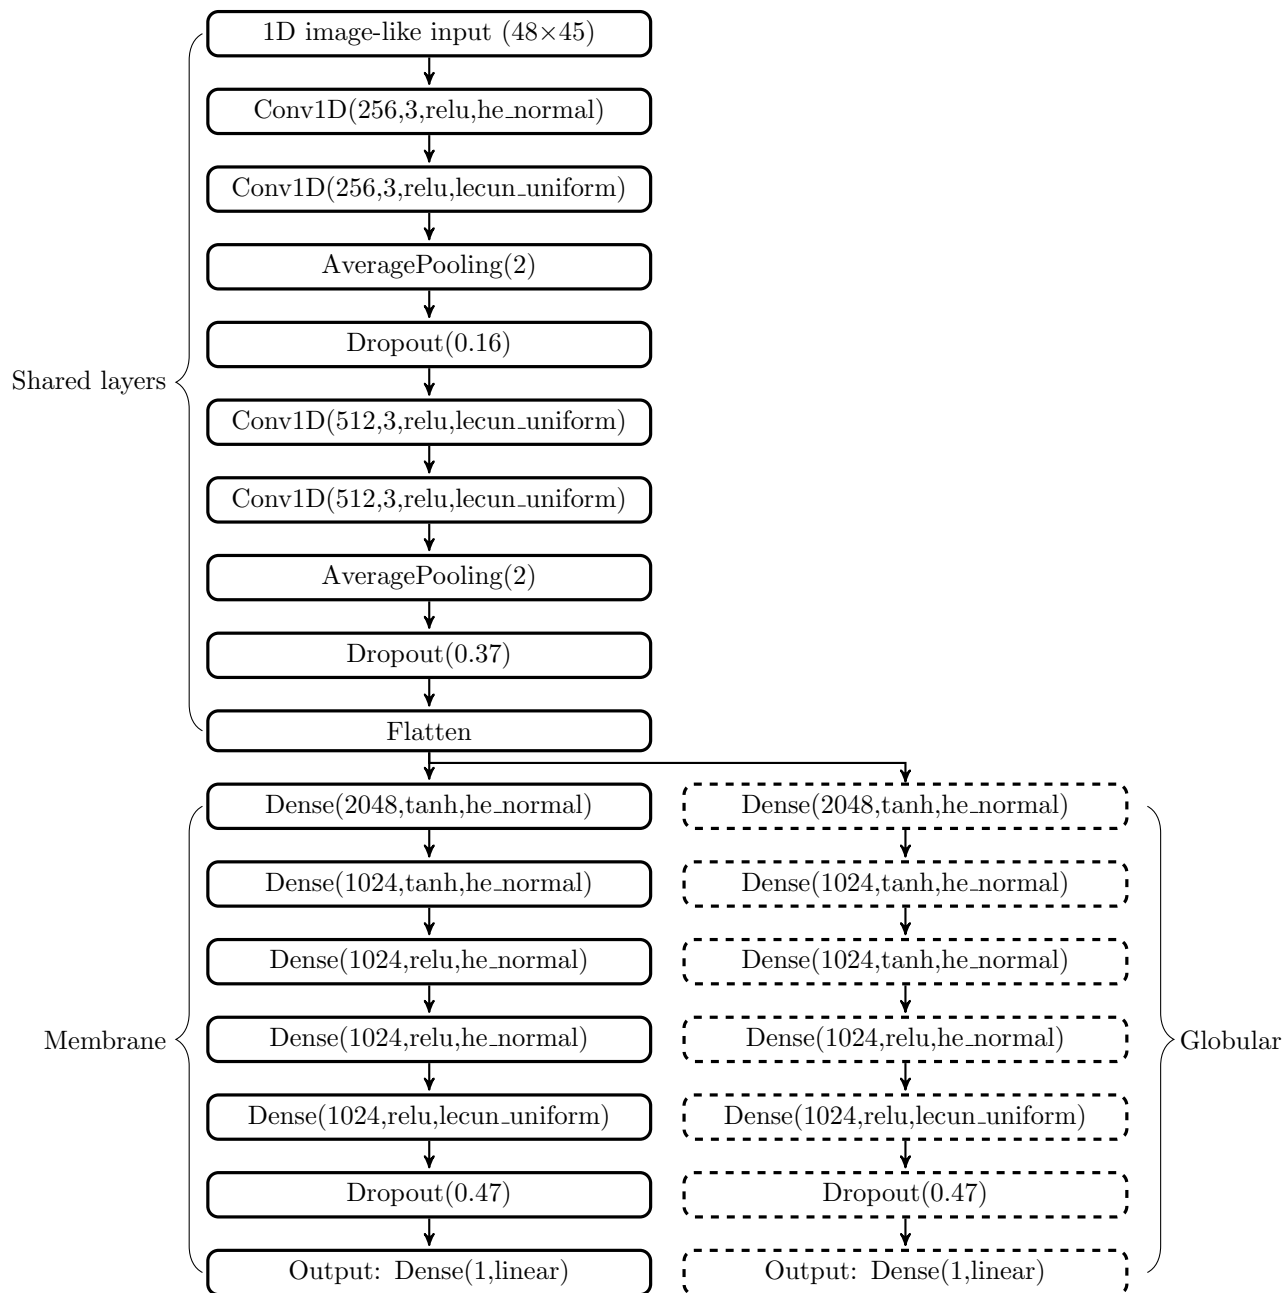

## Keras code for TNet-BP (Keras==1.1.2)

```
import numpy as np
from keras.models import Sequential
from keras.layers import Dense, Dropout, Activation, Flatten
from keras.optimizers import SGD, Adam
from keras.layers import Convolution1D, MaxPooling1D, AveragePooling1D

# Load X_train, X_test, Y_train, Y_test as feature inputs and labels

model = Sequential()
model.add(Convolution1D(128, 3, border_mode='same', input_shape=X_train.shape[1:]))
model.add(Activation('relu'))
model.add(Convolution1D(128, 3))
model.add(Activation('relu'))
model.add(AveragePooling1D(pool_length=2, stride=None, border_mode='valid'))
model.add(Dropout(0.25))
model.add(Convolution1D(256, 3, border_mode='same'))
model.add(Activation('relu'))
model.add(Convolution1D(256, 3))
model.add(Activation('relu'))
model.add(AveragePooling1D(pool_length=2, stride=None, border_mode='valid'))
model.add(Dropout(0.25))
model.add(Flatten())
model.add(Dense(2048))
model.add(Activation('tanh'))
model.add(Dense(2048))
model.add(Activation('tanh'))
model.add(Dense(2048))
model.add(Activation('relu'))
model.add(Dropout(0.5))
model.add(Dense(1))
model.add(Activation('linear'))
adam = Adam(lr=0.0001)
model.compile(loss='mean_squared_error',
              optimizer=adam,
              metrics=['mean_squared_error'])

batch_size = 16
nb_epoch = 2000
history = model.fit(X_train, Y_train,
                   batch_size=batch_size,
                   nb_epoch=nb_epoch,
                   validation_data=(X_test, Y_test),
                   shuffle=True)
```

### Keras code for TNet-MP-1 (Keras==1.1.2)

```
import numpy as np
from keras.models import Sequential
from keras.layers import Dense, Dropout, Activation, Flatten, Merge
from keras.optimizers import SGD, Adam
from keras.layers import Convolution1D, MaxPooling1D, AveragePooling1D

# X_train and X_test are the image like features from persistent homology.
# Y_train and Y_test are labels.
# X_cl_train and X_cl_test are the auxiliary features.

model = Sequential()
model.add(Convolution1D(256, 3, border_mode='same', input_shape=X_train.shape[1:],
                       init='he_normal'))
model.add(Activation('relu'))
model.add(Convolution1D(256, 3, init='lecun_uniform'))
model.add(Activation('relu'))
model.add(AveragePooling1D(pool_length=2, stride=None, border_mode='valid'))
model.add(Dropout(0.16))
model.add(Convolution1D(512, 3, border_mode='same', init='lecun_uniform'))
model.add(Activation('relu'))
model.add(Convolution1D(512, 3, init='lecun_uniform'))
model.add(Activation('relu'))
model.add(AveragePooling1D(pool_length=2, stride=None, border_mode='valid'))
model.add(Dropout(0.37))
model.add(Flatten())
model_cl = Sequential()
model_cl.add(Dense(1024, input_dim=X_cl_train.shape[1], init='he_normal'))
model_cl.add(Dense(2048, init='he_normal'))
model_cl.add(Activation('tanh'))
model_cl.add(Dense(1024, init='he_normal'))
model_cl.add(Activation('tanh'))
model_cl.add(Dense(1024, init='he_normal'))
model_cl.add(Activation('relu'))
model_cl.add(Dense(1024, init='he_normal'))
model_cl.add(Activation('relu'))
model_merged = Sequential()
model_merged.add(Merge([model, model_cl], mode = 'concat'))
model_merged.add(Dense(1024, init='lecun_uniform'))
model_merged.add(Activation('relu'))
model_merged.add(Dropout(0.47))
model_merged.add(Dense(1))
model_merged.add(Activation('linear'))
adam = Adam(lr=0.0001)
model_merged.compile(loss='mean_squared_error',
                    optimizer=adam,
                    metrics=['mean_squared_error'])
batch_size = 16
```

```
nb_epoch = 500
history = model_merged.fit([X_train, X_cl_train], Y_train,
                            batch_size=batch_size,
                            nb_epoch=nb_epoch,
                            validation_data=(X_test, X_cl_test), Y_test),
                            shuffle=True)
```

## Keras code for TNet-MMP-1 (Keras==1.1.2)

```
import numpy as np
from keras.models import Model, Sequential
from keras.layers import Input, Dense, Dropout, Flatten
from keras.optimizers import SGD, Adam
from keras.layers import Convolution1D, MaxPooling1D, AveragePooling1D

# X_S2648, Y_S2648 are feature and label for the globular protein dataset
# X_M223_train, X_M223_test, Y_M223_train, Y_M223_test
# are the features and labels for the membrane protein dataset

inputs = Input(shape=X_M223_train.shape[1:])
model_shared = Convolution1D(256, 3, border_mode='same',
                             activation='relu', init='he_normal')(inputs)
model_shared = Convolution1D(256, 3, activation='relu',
                             init='lecun_uniform')(model_shared)
model_shared = AveragePooling1D(pool_length=2, stride=None,
                                 border_mode='valid')(model_shared)
model_shared = Dropout(0.16)(model_shared)
model_shared = Convolution1D(512, 3, border_mode='same',
                             activation='relu', init='lecun_uniform')(model_shared)
model_shared = Convolution1D(512, 3, activation='relu',
                             init='lecun_uniform')(model_shared)
model_shared = AveragePooling1D(pool_length=2, stride=None,
                                 border_mode='valid')(model_shared)
model_shared = Dropout(0.37)(model_shared)
model_S2648 = Flatten()(model_shared)
model_S2648 = Dense(2048, activation='tanh', init='he_normal')(model_S2648)
model_S2648 = Dense(1024, activation='tanh', init='he_normal')(model_S2648)
model_S2648 = Dense(1024, activation='relu', init='he_normal')(model_S2648)
model_S2648 = Dense(1024, activation='relu', init='he_normal')(model_S2648)
model_S2648 = Dense(1024, activation='relu', init='lecun_uniform')(model_S2648)
model_S2648 = Dropout(0.47)(model_S2648)
model_S2648 = Dense(1, activation='linear')(model_S2648)
model_M223 = Flatten()(model_shared)
model_M223 = Dense(2048, activation='tanh', init='he_normal')(model_M223)
model_M223 = Dense(1024, activation='tanh', init='he_normal')(model_M223)
model_M223 = Dense(1024, activation='relu', init='he_normal')(model_M223)
model_M223 = Dense(1024, activation='relu', init='he_normal')(model_M223)
model_M223 = Dense(1024, activation='relu', init='lecun_uniform')(model_M223)
model_M223 = Dropout(0.47)(model_M223)
model_M223 = Dense(1, activation='linear')(model_M223)
ModelM223 = Model(input=inputs, output=model_M223)
ModelS2648 = Model(input=inputs, output=model_S2648)
adam = Adam(lr=0.0001)
ModelM223.compile(optimizer=adam, loss='mean_squared_error',
                 metrics=['mean_squared_error'])
ModelS2648.compile(optimizer=adam, loss='mean_squared_error',
```

```
        metrics=['mean_squared_error'])
ModelS2648.fit(X_S2648, Y_S2648, batch_size=16, nb_epoch=800, shuffle=True)
ModelM223.fit(X_M223_train, Y_M223_train, batch_size=16, nb_epoch=100,
             validation_data=(X_M223_test, Y_M223_test), shuffle=True)
```
